# Supplementary material for: Roar of a Champion: Loudness and Voice Pitch Predict Perceived Fighting Ability but Not Success in MMA Fighters
Source: PubMed Central journal article supplement (PMC6502904; doi:10.3389/fpsyg.2019.00859), 2019-04-30
Supplement: Table_1.pdf [file Table_1.pdf]

## *Supplementary Material*

# **Roar of a Champion: Loudness and Voice Pitch Predict Perceived Fighting Ability But Not Success in MMA Fighters**

**Pavel Šebesta, Vít Třebický, Jitka Fialová & Jan Havlíček\***

\* **Correspondence:** [jhavlicek@natur.cuni.cz](mailto:jhavlicek@natur.cuni.cz)

**Table S1** | Descriptive statistics of Roars' acoustic parameters

|                | <b>Attempt</b> | <b>Mean</b> | <b>SD</b> | <b>Minimum</b> | <b>Maximum</b> |
|----------------|----------------|-------------|-----------|----------------|----------------|
| F0 (Hz)        | 1st roar       | 385.913     | 61.397    | 224.377        | 492.632        |
|                | 2nd roar       | 394.978     | 55.812    | 243.503        | 492.725        |
|                | 3rd roar       | 392.557     | 53.986    | 214.188        | 491.509        |
| F3 (Hz)        | 1st roar       | 2546.047    | 220.79    | 2194           | 3160           |
|                | 2nd roar       | 2621.953    | 246.95    | 2196           | 3150           |
|                | 3rd roar       | 2612.93     | 263.513   | 2168           | 3157           |
| HNR (dB)       | 1st roar       | 7.886       | 3.642     | 1.853          | 15.913         |
|                | 2nd roar       | 7.564       | 4.26      | 0.901          | 19.532         |
|                | 3rd roar       | 8.247       | 5.334     | 1.54           | 27.299         |
| Intensity (dB) | 1st roar       | 53.505      | 5.285     | 41.169         | 62.878         |
|                | 2nd roar       | 54.73       | 4.639     | 44.619         | 61.819         |
|                | 3rd roar       | 54.935      | 5.141     | 41.744         | 64.565         |
| Duration (s)   | 1st roar       | 0.638       | 0.312     | 0.149          | 1.491          |
|                | 2nd roar       | 0.652       | 0.308     | 0.138          | 1.28           |
|                | 3rd roar       | 0.637       | 0.306     | 0.117          | 1.337          |

**Table S2** | Repeated Measures ANOVA for Roars' F<sub>0</sub> (Hz)**Within Subjects Effects**

|          | <b>Sphericity Correction</b> | <b>Sum of Squares</b> | <b>df</b> | <b>Mean Square</b> | <b>F</b> | <b>p</b> | <b><math>\eta^2</math></b> |
|----------|------------------------------|-----------------------|-----------|--------------------|----------|----------|----------------------------|
| Roar F0  | None                         | 1894.676              | 2         | 947.338            | 2.69     | 0.074    | 0.06                       |
|          | Greenhouse-Geisser           | 1894.676              | 1.556     | 1217.858           | 2.69     | 0.088    | 0.06                       |
| Residual | None                         | 29581.193             | 84        | 352.157            |          |          |                            |
|          | Greenhouse-Geisser           | 29581.193             | 65.341    | 452.718            |          |          |                            |

**Between Subjects Effects**

|          | <b>Sum of Squares</b> | <b>df</b> | <b>Mean Square</b> | <b>F</b> | <b>p</b> | <b><math>\eta^2</math></b> |
|----------|-----------------------|-----------|--------------------|----------|----------|----------------------------|
| Residual | 381981.236            | 42        | 9094.791           |          |          |                            |

**Tests of Sphericity**

|         | <b>Mauchly's W</b> | <b>p</b> | <b>Greenhouse-Geisser <math>\epsilon</math></b> | <b>Huynh-Feldt <math>\epsilon</math></b> |
|---------|--------------------|----------|-------------------------------------------------|------------------------------------------|
| Roar F0 | 0.714              | 0.001    | 0.778                                           | 0.802                                    |

Note. Type 3 Sums of Squares

**Table S3 | Repeated Measures ANOVA for Roars' F<sub>3</sub> (Hz)**

**Within Subjects Effects**

|          | <b>Sphericity Correction</b> | <b>Sum of Squares</b> | <b>df</b> | <b>Mean Square</b> | <b>F</b> | <b>p</b> | <b>η<sup>2</sup></b> |
|----------|------------------------------|-----------------------|-----------|--------------------|----------|----------|----------------------|
| Roar F3  | None                         | 147872.992            | 2         | 73936.496          | 3.861    | 0.025    | 0.084                |
|          | Greenhouse-Geisser           | 147872.992            | 1.935     | 76421.127          | 3.861    | 0.026    | 0.084                |
| Residual | None                         | 1.61E+06              | 84        | 19149.036          |          |          |                      |
|          | Greenhouse-Geisser           | 1.61E+06              | 81.269    | 19792.538          |          |          |                      |

**Between Subjects Effects**

|          | <b>Sum of Squares</b> | <b>df</b> | <b>Mean Square</b> | <b>F</b> | <b>p</b> | <b>η<sup>2</sup></b> |
|----------|-----------------------|-----------|--------------------|----------|----------|----------------------|
| Residual | 5.92E+06              | 42        | 140873.467         |          |          |                      |

**Tests of Sphericity**

|         | <b>Mauchly's W</b> | <b>p</b> | <b>Greenhouse-Geisser ε</b> | <b>Huynh-Feldt ε</b> |
|---------|--------------------|----------|-----------------------------|----------------------|
| Roar F3 | 0.966              | 0.496    | 0.967                       | 1                    |

**Post Hoc Comparisons - Roar F3**

| <b>Comparison</b> |                | <b>Mean Difference</b> | <b>SE</b> | <b>df</b> | <b>t</b> | <b>ptukey</b> |
|-------------------|----------------|------------------------|-----------|-----------|----------|---------------|
| <b>Roar F3</b>    | <b>Roar F3</b> |                        |           |           |          |               |
| 1st roar          | - 2nd roar     | -75.907                | 29.844    | 84        | -2.543   | 0.034         |
|                   | - 3rd roar     | -66.884                | 29.844    | 84        | -2.241   | 0.07          |
| 2nd roar          | - 3rd roar     | 9.023                  | 29.844    | 84        | 0.302    | 0.951         |

Note. Type 3 Sums of Squares

**Table S4** | Repeated Measures ANOVA for Roars' HNR (dB)**Within Subjects Effects**

|          | <b>Sphericity Correction</b> | <b>Sum of Squares</b> | <b>df</b> | <b>Mean Square</b> | <b>F</b> | <b>p</b> | <b><math>\eta^2</math></b> |
|----------|------------------------------|-----------------------|-----------|--------------------|----------|----------|----------------------------|
| Roar HNR | None                         | 10.04                 | 2         | 5.021              | 0.685    | 0.507    | 0.016                      |
|          | Greenhouse-Geisser           | 10.04                 | 1.379     | 7.28               | 0.685    | 0.456    | 0.016                      |
| Residual | None                         | 615.5                 | 84        | 7.328              |          |          |                            |
|          | Greenhouse-Geisser           | 615.5                 | 57.94     | 10.62              |          |          |                            |

**Between Subjects Effects**

|          | <b>Sum of Squares</b> | <b>df</b> | <b>Mean Square</b> | <b>F</b> | <b>p</b> | <b><math>\eta^2</math></b> |
|----------|-----------------------|-----------|--------------------|----------|----------|----------------------------|
| Residual | 1899                  | 42        | 45.22              |          |          |                            |

**Tests of Sphericity**

|          | <b>Mauchly's W</b> | <b>p</b> | <b>Greenhouse-Geisser <math>\epsilon</math></b> | <b>Huynh-Feldt <math>\epsilon</math></b> |
|----------|--------------------|----------|-------------------------------------------------|------------------------------------------|
| Roar HNR | 0.55               | < 0.001  | 0.69                                            | 0.706                                    |

Note. Type 3 Sums of Squares

**Table S5 | Repeated Measures ANOVA for Roars' intensity (dB)**

**Within Subjects Effects**

|                | <b>Sphericity Correction</b> | <b>Sum of Squares</b> | <b>df</b> | <b>Mean Square</b> | <b>F</b> | <b>p</b> | <b><math>\eta^2</math></b> |
|----------------|------------------------------|-----------------------|-----------|--------------------|----------|----------|----------------------------|
| Roar intensity | None                         | 50.228                | 2         | 25.114             | 8.971    | <0.001   | 0.18                       |
|                | Greenhouse-Geisser           | 50.228                | 1.746     | 28.776             | 8.971    | <0.001   | 0.18                       |
| Residual       | None                         | 229.562               | 82        | 2.8                |          |          |                            |
|                | Greenhouse-Geisser           | 229.562               | 71.566    | 3.208              |          |          |                            |

**Between Subjects Effects**

|          | <b>Sum of Squares</b> | <b>df</b> | <b>Mean Square</b> | <b>F</b> | <b>p</b> | <b><math>\eta^2</math></b> |
|----------|-----------------------|-----------|--------------------|----------|----------|----------------------------|
| Residual | 2881.603              | 41        | 70.283             |          |          |                            |

**Tests of Sphericity**

|                | <b>Mauchly's W</b> | <b>p</b> | <b>Greenhouse-Geisser <math>\epsilon</math></b> | <b>Huynh-Feldt <math>\epsilon</math></b> |
|----------------|--------------------|----------|-------------------------------------------------|------------------------------------------|
| Roar intensity | 0.854              | 0.043    | 0.873                                           | 0.908                                    |

**Post Hoc Comparisons - Roar intensity**

| <b>Comparison</b>     |                       | <b>Mean Difference</b> | <b>SE</b> | <b>df</b> | <b>t</b> | <b>ptukey</b> |
|-----------------------|-----------------------|------------------------|-----------|-----------|----------|---------------|
| <b>Roar intensity</b> | <b>Roar intensity</b> |                        |           |           |          |               |
| 1st roar              | - 2nd roar            | -1.225                 | 0.365     | 82        | -3.354   | 0.003         |
|                       | - 3rd roar            | -1.43                  | 0.365     | 82        | -3.917   | <0.001        |
| 2nd roar              | - 3rd roar            | -0.206                 | 0.365     | 82        | -0.563   | 0.84          |

Note. Type 3 Sums of Squares

**Table S6** | Repeated Measures ANOVA for Roars' duration (s)**Within Subjects Effects**

|               | <b>Sphericity Correction</b> | <b>Sum of Squares</b> | <b>df</b> | <b>Mean Square</b> | <b>F</b> | <b>p</b> | <b><math>\eta^2</math></b> |
|---------------|------------------------------|-----------------------|-----------|--------------------|----------|----------|----------------------------|
| Roar duration | None                         | 0.006                 | 2         | 0.003              | 0.379    | 0.686    | 0.009                      |
|               | Greenhouse-Geisser           | 0.006                 | 1.633     | 0.003              | 0.379    | 0.643    | 0.009                      |
| Residual      | None                         | 0.606                 | 82        | 0.007              |          |          |                            |
|               | Greenhouse-Geisser           | 0.606                 | 66.942    | 0.009              |          |          |                            |

**Between Subjects Effects**

|          | <b>Sum of Squares</b> | <b>df</b> | <b>Mean Square</b> | <b>F</b> | <b>p</b> | <b><math>\eta^2</math></b> |
|----------|-----------------------|-----------|--------------------|----------|----------|----------------------------|
| Residual | 11.107                | 41        | 0.271              |          |          |                            |

**Tests of Sphericity**

|               | <b>Mauchly's W</b> | <b>p</b> | <b>Greenhouse-Geisser <math>\epsilon</math></b> | <b>Huynh-Feldt <math>\epsilon</math></b> |
|---------------|--------------------|----------|-------------------------------------------------|------------------------------------------|
| Roar duration | 0.775              | 0.006    | 0.816                                           | 0.846                                    |

Note. Type 3 Sums of Squares

**Table S7** | Correlations of F0 between individual Roar attempts

|                  | Statistics   | 1st roar F0<br>(Hz) | 2nd roar F0<br>(Hz) | 3rd roar F0<br>(Hz) |
|------------------|--------------|---------------------|---------------------|---------------------|
| 1st roar F0 (Hz) | Pearson's r  | —                   | <b>0.926</b> ***    | <b>0.845</b> ***    |
|                  | p-value      | —                   | < 0.001             | < 0.001             |
|                  | 95% CI Upper | —                   | 0.959               | 0.914               |
|                  | 95% CI Lower | —                   | 0.866               | 0.731               |
| 2nd roar F0 (Hz) | Pearson's r  | —                   | —                   | <b>0.919</b> ***    |
|                  | p-value      | —                   | —                   | < 0.001             |
|                  | 95% CI Upper | —                   | —                   | 0.955               |
|                  | 95% CI Lower | —                   | —                   | 0.854               |
| 3rd roar F0 (Hz) | Pearson's r  | —                   | —                   | —                   |
|                  | p-value      | —                   | —                   | —                   |
|                  | 95% CI Upper | —                   | —                   | —                   |
|                  | 95% CI Lower | —                   | —                   | —                   |

Note. \* p < .05, \*\* p < .01, \*\*\* p < .001

**Table S8** | Correlations of F3 between individual Roar attempts

|                  | Statistics   | 1st roar F3<br>(Hz) | 2nd roar F3<br>(Hz) | 3rd roar F3<br>(Hz) |
|------------------|--------------|---------------------|---------------------|---------------------|
|                  | Pearson's r  | —                   | <b>0.719</b> ***    | <b>0.648</b> ***    |
| 1st roar F3 (Hz) | p-value      | —                   | <0.001              | <0.001              |
|                  | 95% CI Upper | —                   | 0.838               | 0.794               |
|                  | 95% CI Lower | —                   | 0.533               | 0.432               |
|                  | Pearson's r  | —                   | —                   | <b>0.689</b> ***    |
| 2nd roar F3 (Hz) | p-value      | —                   | —                   | <0.001              |
|                  | 95% CI Upper | —                   | —                   | 0.819               |
|                  | 95% CI Lower | —                   | —                   | 0.49                |
|                  | Pearson's r  | —                   | —                   | —                   |
| 3rd roar F3 (Hz) | p-value      | —                   | —                   | —                   |
|                  | 95% CI Upper | —                   | —                   | —                   |
|                  | 95% CI Lower | —                   | —                   | —                   |
|                  | Pearson's r  | —                   | —                   | —                   |

Note. \*  $p < .05$ , \*\*  $p < .01$ , \*\*\*  $p < .001$



**Table S9** | Correlations of HNR between individual Roar attempts

|                   | Statistics   | 1st roar HNR (dB) | 2nd roar HNR (dB) | 3rd roar HNR (dB) |
|-------------------|--------------|-------------------|-------------------|-------------------|
| 1st roar HNR (dB) | Pearson's r  | —                 | <b>0.656</b> ***  | <b>0.446</b> **   |
|                   | p-value      | —                 | < 0.001           | 0.003             |
|                   | 95% CI Upper | —                 | 0.799             | 0.658             |
|                   | 95% CI Lower | —                 | 0.443             | 0.169             |
| 2nd roar HNR (dB) | Pearson's r  | —                 | —                 | <b>0.837</b> ***  |
|                   | p-value      | —                 | —                 | < 0.001           |
|                   | 95% CI Upper | —                 | —                 | 0.909             |
|                   | 95% CI Lower | —                 | —                 | 0.718             |
| 3rd roar HNR (dB) | Pearson's r  | —                 | —                 | —                 |
|                   | p-value      | —                 | —                 | —                 |
|                   | 95% CI Upper | —                 | —                 | —                 |
|                   | 95% CI Lower | —                 | —                 | —                 |

Note. \* p < .05, \*\* p < .01, \*\*\* p < .001

**Table S10** | Correlations of intensity between individual Roar attempts

|                            | Statistics   | 1st roar<br>intensity (dB) | 2nd roar<br>intensity (dB) | 3rd roar<br>intensity (dB) |
|----------------------------|--------------|----------------------------|----------------------------|----------------------------|
|                            | Pearson's r  | —                          | <b>0.922</b> ***           | <b>0.858</b> ***           |
| 1st roar intensity<br>(dB) | p-value      | —                          | < 0.001                    | < 0.001                    |
|                            | 95% CI Upper | —                          | 0.957                      | 0.922                      |
|                            | 95% CI Lower | —                          | 0.858                      | 0.75                       |
|                            | Pearson's r  |                            | —                          | <b>0.904</b> ***           |
| 2nd roar intensity<br>(dB) | p-value      |                            | —                          | < 0.001                    |
|                            | 95% CI Upper |                            | —                          | 0.948                      |
|                            | 95% CI Lower |                            | —                          | 0.827                      |
|                            | Pearson's r  |                            |                            | —                          |
| 3rd roar intensity<br>(dB) | p-value      |                            |                            | —                          |
|                            | 95% CI Upper |                            |                            | —                          |
|                            | 95% CI Lower |                            |                            | —                          |

Note. \*  $p < .05$ , \*\*  $p < .01$ , \*\*\*  $p < .001$

**Table S11** | Correlations of duration between individual Roar attempts

|                       | Statistics   | 1st roar duration (s) | 2nd roar duration (s) | 3rd roar duration (s) |
|-----------------------|--------------|-----------------------|-----------------------|-----------------------|
| 1st roar duration (s) | Pearson's r  | —                     | <b>0.938</b> ***      | <b>0.886</b> ***      |
|                       | p-value      | —                     | < 0.001               | < 0.001               |
|                       | 95% CI Upper | —                     | 0.966                 | 0.937                 |
|                       | 95% CI Lower | —                     | 0.887                 | 0.797                 |
| 2nd roar duration (s) | Pearson's r  | —                     | —                     | <b>0.943</b> ***      |
|                       | p-value      | —                     | —                     | < 0.001               |
|                       | 95% CI Upper | —                     | —                     | 0.969                 |
|                       | 95% CI Lower | —                     | —                     | 0.896                 |
| 3rd roar duration (s) | Pearson's r  | —                     | —                     | —                     |
|                       | p-value      | —                     | —                     | —                     |
|                       | 95% CI Upper | —                     | —                     | —                     |
|                       | 95% CI Lower | —                     | —                     | —                     |

Note. \* p < .05, \*\* p < .01, \*\*\* p < .001

**Table S12** | Linear mixed effect model analysis for physical fitness predictors of perceived fighting ability from roars based on female and male ratings

| <b>Info</b>              |                                                                                                          |              |
|--------------------------|----------------------------------------------------------------------------------------------------------|--------------|
| Estimate                 | Linear mixed model fit by REML                                                                           |              |
| Call                     | Roar_rating ~ 1 + (1   Rater_id) + (1   Target_id) + age + height + weight + Handgrip_mean + FVC_1 + PEF |              |
|                          | Female ratings                                                                                           | Male ratings |
| AIC                      | 3704.6729                                                                                                | 3523.5605    |
| R-squared<br>Marginal    | 0.0926                                                                                                   | 0.0720       |
| R-squared<br>Conditional | 0.5977                                                                                                   | 0.6227       |

**Table S13** | Summary of linear mixed effect model analysis for physical fitness predictors of perceived fighting ability from roars based on female and male ratings

|                | <b>Coefficients</b>    | <b>Estimate</b> | <b><i>t</i></b> | <b>p</b> | <b>95% CI</b> |
|----------------|------------------------|-----------------|-----------------|----------|---------------|
| Female ratings | Age (yrs)              | 0.079           | 1.536           | 0.136    | -0.022, 0.181 |
|                | Height (cm)            | -0.045          | -0.879          | 0.387    | -0.146, 0.056 |
|                | Weight (kg)            | 0.017           | 0.889           | 0.382    | -0.020, 0.053 |
|                | FVC (l)                | 0.482           | 1.692           | 0.102    | -0.077, 1.041 |
|                | PEF (l)                | -0.130          | -1.311          | 0.201    | -0.324, 0.064 |
|                | Handgrip strength (kg) | 0.003           | 0.010           | 0.921    | -0.057, 0.063 |
| Male ratings   | Age (yrs)              | 0.067           | 1.447           | 0.159    | -0.024, 0.159 |
|                | Height (cm)            | -0.042          | -0.907          | 0.372    | -0.132, 0.049 |
|                | Weight (kg)            | 0.018           | 1.047           | 0.304    | -0.015, 0.051 |
|                | FVC (l)                | 0.322           | 1.256           | 0.220    | -0.181, 0.825 |
|                | PEF (l)                | -0.098          | -1.106          | 0.279    | -0.273, 0.076 |
|                | Handgrip strength (kg) | 0.006           | 0.209           | 0.836    | -0.048, 0.064 |

**Table S14** | Linear mixed effect model analysis for physical fitness predictors of perceived fighting ability from utterances based on female and male ratings

| Info                     |                                                                                                               |              |
|--------------------------|---------------------------------------------------------------------------------------------------------------|--------------|
| Estimate                 | Linear mixed model fit by REML                                                                                |              |
| Call                     | Utterance_rating ~ 1 + (1   Rater_id) + (1   Target_id) + age + height + weight + Handgrip_mean + FVC_1 + PEF |              |
|                          | Female ratings                                                                                                | Male ratings |
| AIC                      | 3616.6268                                                                                                     | 3481.6454    |
| R-squared<br>Marginal    | 0.0536                                                                                                        | 0.0554       |
| R-squared<br>Conditional | 0.4115                                                                                                        | 0.4750       |

**Table S15** | Summary of linear mixed effect model analysis for physical fitness predictors of perceived fighting ability from utterances based on female and male ratings

|                | <b>Coefficients</b>    | <b>Estimate</b> | <b><i>t</i></b> | <b>p</b> | <b>95% CI</b>  |
|----------------|------------------------|-----------------|-----------------|----------|----------------|
| Female ratings | Age (yrs)              | 0.019           | 0.727           | 0.474    | -0.033, 0.071  |
|                | Height (cm)            | 0.047           | 1.799           | 0.083    | -0.004, 0.099  |
|                | Weight (kg)            | -0.009          | -0.915          | 0.368    | -0.027, 0.010  |
|                | FVC (l)                | -0.287          | -1.971          | 0.059    | -0.573, -0.002 |
|                | PEF (l)                | 0.021           | 0.411           | 0.684    | -0.078, 0.120  |
|                | Handgrip strength (kg) | 0.013           | 0.808           | 0.426    | -0.018, 0.043  |
| Male ratings   | Age (yrs)              | 0.028           | 1.075           | 0.292    | -0.023, 0.080  |
|                | Height (cm)            | 0.052           | 1.994           | 0.056    | 0.020, 0.103   |
|                | Weight (kg)            | -0.011          | -1.114          | 0.275    | -0.029, 0.008  |
|                | FVC (l)                | -0.267          | -1.841          | 0.077    | -0.552, 0.017  |
|                | PEF (l)                | 0.011           | 0.219           | 0.828    | -0.088, 0.110  |
|                | Handgrip strength (kg) | 0.010           | 0.626           | 0.537    | -0.021, 0.040  |

**Table S16** | Linear mixed effect model analysis for acoustic predictors of perceived fighting ability from roars based on female and male ratings

| Info                     |                                                                                                                                                            |              |
|--------------------------|------------------------------------------------------------------------------------------------------------------------------------------------------------|--------------|
| Estimate                 | Linear mixed model fit by REML                                                                                                                             |              |
| Call                     | Roar_rating ~ 1 + (1   Rater_id) + (1   Target_id) + `Shout_F0_(h1)_hz` + `Shout_F3_(khz2)_hz` + Shout_HNR_dB + Shout_duration_s + shout_intensity_mean_dB |              |
|                          | Female ratings                                                                                                                                             | Male ratings |
| AIC                      | 4272.859                                                                                                                                                   | 4107.777     |
| R-squared<br>Marginal    | 0.413                                                                                                                                                      | 0.339        |
| R-squared<br>Conditional | 0.566                                                                                                                                                      | 0.579        |



**Table S17** | Summary of linear mixed effect model analysis for acoustic predictors of perceived fighting ability from roars based on female and male ratings

|                | <b>Coefficients</b> | <b>Estimate</b> | <b><i>t</i></b> | <b>p</b> | <b>95% CI</b>    |
|----------------|---------------------|-----------------|-----------------|----------|------------------|
| Female ratings | F <sub>0</sub> (Hz) | 0.006           | 3.620           | <0.001   | 0.003, 0.009     |
|                | F <sub>3</sub> (Hz) | -0.0002         | 0.762           | 0.451    | -0.0007, 0.0003  |
|                | HNR (dB)            | -0.075          | 6.489           | <0.001   | -0.098, -0.052   |
|                | Intensity (dB)      | 0.128           | 7.057           | <0.001   | 0.092, 0.164     |
|                | Duration (s)        | 1.165           | 5.420           | <0.001   | 0.743, 1.586     |
| Male ratings   | F <sub>0</sub> (Hz) | 0.005           | 2.72            | 0.010    | 0.001, 0.008     |
|                | F <sub>3</sub> (Hz) | -0.00006        | -2.22           | 0.033    | -0.001, -0.00001 |
|                | HNR (dB)            | -0.065          | -5.25           | <0.001   | -0.090, -0.041   |
|                | Intensity (dB)      | 0.122           | 6.23            | <0.001   | 0.083, 0.160     |
|                | Duration (s)        | 0.658           | 2.85            | 0.007    | 0.205, 1.111     |

**Table S18** | Linear mixed effect model analysis for acoustic predictors of perceived fighting ability from utterances based on female and male ratings

| Info                     |                                                                                                                                                                                            |              |
|--------------------------|--------------------------------------------------------------------------------------------------------------------------------------------------------------------------------------------|--------------|
| Estimate                 | Linear mixed model fit by REML                                                                                                                                                             |              |
| Call                     | Utterance_rating ~ 1 + (1   Rater_id) + (1   Target_id) + ` Utterance _F0_(h1)_hz` + ` Utterance _F3_(khz2)_hz` + Utterance _HNR_dB + Utterance _duration_s + Utterance _intensity_mean_dB |              |
|                          | Female ratings                                                                                                                                                                             | Male ratings |
| AIC                      | 4260.9175                                                                                                                                                                                  | 4094.7579    |
| R-squared<br>Marginal    | 0.0993                                                                                                                                                                                     | 0.0954       |
| R-squared<br>Conditional | 0.4026                                                                                                                                                                                     | 0.4653       |

**Table S19** | Summary of linear mixed effect model analysis for acoustic predictors of perceived fighting ability from utterances based on female and male ratings

|                | <b>Coefficients</b> | <b>Estimate</b> | <b><i>t</i></b> | <b>p</b> | <b>95% CI</b>   |
|----------------|---------------------|-----------------|-----------------|----------|-----------------|
| Female ratings | F <sub>0</sub> (Hz) | -0.016          | -3.028          | 0.005    | -0.026, -0.006  |
|                | F <sub>3</sub> (Hz) | -0.0001         | -1.147          | 0.260    | -0.003, 0.00007 |
|                | HNR (dB)            | 0.013           | 0.357           | 0.723    | -0.058, 0.084   |
|                | Intensity (dB)      | 0.143           | 4.503           | <0.001   | 0.080, 0.205    |
|                | Duration (s)        | -0.025          | -0.727          | 0.472    | -0.094, 0.043   |
| Male ratings   | F <sub>0</sub> (Hz) | -0.018          | -3.402          | 0.002    | -0.028, -0.007  |
|                | F <sub>3</sub> (Hz) | -0.001          | -1.198          | 0.239    | -0.003, 0.0006  |
|                | HNR (dB)            | 0.00004         | 0.013           | 0.990    | -0.068, 0.069   |
|                | Intensity (dB)      | 0.138           | 4.505           | <0.001   | 0.078, 0.198    |
|                | Duration (s)        | -0.021          | -0.606          | 0.548    | -0.087, 0.046   |
